# Supplementary material for: Potency of umbilical cord blood- and Wharton’s jelly-derived mesenchymal stem cells for scarless wound healing
Source: Springer Nature journal article supplement (doi:10.1038/srep18844), 2016-01-05
Supplement: 41598_2016_BFsrep18844_MOESM1_ESM.pdf [file 41598_2016_BFsrep18844_MOESM1_ESM.pdf]

**Potency of umbilical cord blood- and Wharton's jelly-derived mesenchymal stem cells for scarless wound healing**

Hanako Doi, Yuriko Kitajima, Lan Luo, Chan Yan, Seiko Tateishi, Yusuke Ono, Yoshishige Urata, Shinji Goto, Ryoichi Mori, Hideaki Masuzaki, Isao Shimokawa, Akiyoshi Hirano, Tao-Sheng Li

**Supplemental table 1.** The primer sequences used to quantify gene expression levels.

| gene                     | Sequence (5'->3')        |                          |
|--------------------------|--------------------------|--------------------------|
|                          | Forward primer           | Reverse primer           |
| <i>HGF</i>               | GCCCTATTTCCCGTTGTGAAGG   | CCCGCAGTTGTTTTGTTTTGGC   |
| <i>MMP2</i>              | CTGGTCGCAGTGATGGCTTC     | GTCCATCTGCATTGCCACCC     |
| <i>PLAU</i>              | AACAGATTCCTGCAAGGGCGA    | CCCAGCTCACAATCCCCTCA     |
| <i>TGFBI</i>             | CGTCACTGGAGTTGTACGGC     | TTGGGGCTGATCCCGTTGA      |
| <i>IL-1A</i>             | GTCGGCAAAGAAATCAAGATGGC  | TCAGAGAGAGATGGTCAATGGCA  |
| <i>IL-1B</i>             | TGCCACCTTTTGACAGTGATGAG  | TGTTGATGTGCTGCTGCGAG     |
| <i>IL-10</i>             | AGGCGCTGTCATCGATTTCTC    | CATGGCCTTGTAGACACCTTGG   |
| <i>VEGFA</i>             | CTCCACCATGCCAAGTGGTC     | ACCAGGGTCTCAATCGGACG     |
| <i>18S ribosomal RNA</i> | TTCTGGCCAACGGTCTAGACAAC  | CCAGTGGTCTTGGTGTGCTGA    |
| <i>COL1A2</i>            | GGATACGCGGACTCTGTTGC     | CCTTTCGTA CTGATCCCGATTGC |
| <i>COL3A1</i>            | TGGACTGAAGGGTGAAAATGGTCT | CCGAGCACCATCATTGCCTC     |
| <i>TGFBI3</i>            | CGAGTGGCTGTTGAGGAGAG     | TCATCTTCATTGTCCACTCCTTGA |
| <i>MMP1B</i>             | AGCTTCCTGCCAGAACCTTTGA   | AGCCCATACTTTGCTGCCTTTG   |

**Supplemental table 2.** Information about the isolation and ex vivo expansion of mesenchymal stem cells from umbilical cord blood (UCB-MSCs) and Wharton’s jelly (WJ-MSCs)

| Donor number | WJ-MSCs | UCB-MSCs |
|--------------|---------|----------|
| <b>#1</b>    | ○       | ×        |
| <b>#2</b>    | ○       | ×        |
| <b>#3</b>    | ○       | ×        |
| <b>#4</b>    | ○       | ×        |
| <b>#5</b>    | ○       | ○        |
| <b>#6</b>    | △       | ×        |
| <b>#7</b>    | ○       | -        |
| <b>#8</b>    | ○       | ×        |
| <b>#9</b>    | -       | ×        |
| <b>#10</b>   | -       | ×        |
| <b>#11</b>   | -       | ×        |
| <b>#12</b>   | -       | ○        |
| <b>#13</b>   | -       | ×        |
| <b>#14</b>   | -       | ×        |

○: successfully expanded a sufficient number of cells (>1,000,000)

×: failed to expand a sufficient number of cells.

△: the most of tissues (explants) failed to attach to dishes due to technical error.

-: no procedure was performed.

**Supplemental table 3.** Results of RT<sup>2</sup> Profiler PCR array. The fold regulation represents the expression levels in umbilical cord blood-derived mesenchymal stem cells (UCB-MSCs) when compared to Wharton's jelly-derived mesenchymal stem cells (WJ-MSCs). The data are presented as the means from three separate experiments. Bolded p-value shows significant difference (P<0.05).

| Inflammatory cytokines & chemokines |                 |              |
|-------------------------------------|-----------------|--------------|
| Gene symbol                         | Fold Regulation | p-value      |
| <i>CCL11</i>                        | -1.19           | 0.197        |
| <i>CCL2</i>                         | -11.83          | <b>0.009</b> |
| <i>CCL3</i>                         | -1.19           | 0.197        |
| <i>CCR2</i>                         | -1.31           | <b>0.007</b> |
| <i>CXCR4</i>                        | -3.80           | 0.168        |
| <i>IFNG</i>                         | -1.19           | 0.197        |
| <i>IL10</i>                         | 1.01            | 0.859        |
| <i>IL13</i>                         | 2.12            | 0.239        |
| <i>IL13RA2</i>                      | -1.11           | 0.653        |
| <i>IL1A</i>                         | -52.02          | <b>0.005</b> |
| <i>IL1B</i>                         | -183.26         | <b>0.026</b> |
| <i>IL4</i>                          | 1.15            | 0.551        |
| <i>IL5</i>                          | -1.06           | 0.974        |
| <i>ILK</i>                          | 1.27            | 0.448        |
| <i>TNF</i>                          | -3.48           | 0.097        |
| TGF-beta superfamily members        |                 |              |
| Gene symbol                         | Fold Regulation | p-value      |
| <i>BMP7</i>                         | -1.19           | 0.197        |
| <i>CAV1</i>                         | 5.49            | 0.102        |
| <i>DCN</i>                          | -3.16           | <b>0.026</b> |
| <i>ENG</i>                          | 1.18            | 0.759        |
| <i>GREM1</i>                        | 1.48            | 0.191        |
| <i>LTBP1</i>                        | 2.13            | <b>0.007</b> |
| <i>SMAD2</i>                        | 1.26            | 0.099        |
| <i>SMAD3</i>                        | 1.05            | 0.836        |
| <i>SMAD4</i>                        | 1.42            | <b>0.009</b> |
| <i>SMAD6</i>                        | 1.34            | 0.400        |
| <i>SMAD7</i>                        | -2.25           | 0.062        |
| <i>TGFB1</i>                        | 1.20            | 0.626        |
| <i>TGFB2</i>                        | -11.51          | <b>0.048</b> |
| <i>TGFB3</i>                        | -2.05           | 0.210        |
| <i>TGFBR1</i>                       | -1.17           | 0.485        |
| <i>TGFBR2</i>                       | -1.40           | 0.311        |
| <i>TGIF1</i>                        | -1.01           | 0.751        |
| <i>THBS1</i>                        | 1.19            | 0.749        |
| <i>THBS2</i>                        | -7.23           | <b>0.029</b> |

| ECM structural constituents & remodeling enzyme |                 |              |
|-------------------------------------------------|-----------------|--------------|
| Gene symbol                                     | Fold Regulation | p-value      |
| <i>COL1A2</i>                                   | -4.01           | <b>0.000</b> |
| <i>COL3A1</i>                                   | -97.53          | <b>0.003</b> |
| <i>LOX</i>                                      | -9.37           | <b>0.019</b> |
| <i>MMP1</i>                                     | 184.68          | <b>0.000</b> |
| <i>MMP13</i>                                    | 2.07            | 0.262        |
| <i>MMP14</i>                                    | 1.05            | 0.683        |
| <i>MMP2</i>                                     | -5.73           | <b>0.024</b> |
| <i>MMP3</i>                                     | 8.37            | 0.237        |
| <i>MMP8</i>                                     | 2.37            | 0.214        |
| <i>MMP9</i>                                     | 1.76            | 0.301        |
| <i>PLAT</i>                                     | 1.29            | 0.534        |
| <i>PLAU</i>                                     | 27.39           | <b>0.007</b> |
| <i>PLG</i>                                      | 1.00            | 0.819        |
| <i>SERPINA1</i>                                 | -4.88           | <b>0.013</b> |
| <i>SERPINE1</i>                                 | -3.68           | 0.106        |
| <i>SERPINH1</i>                                 | -1.98           | <b>0.001</b> |
| <i>TIMP1</i>                                    | -2.41           | 0.056        |
| <i>TIMP2</i>                                    | 1.64            | 0.061        |
| <i>TIMP3</i>                                    | -8.06           | 0.063        |
| <i>TIMP4</i>                                    | 2.17            | 0.060        |
| Growth factors                                  |                 |              |
| Gene symbol                                     | Fold Regulation | p-value      |
| <i>AGT</i>                                      | 2.83            | 0.381        |
| <i>CTGF</i>                                     | -1.88           | 0.103        |
| <i>EDNI</i>                                     | -2.16           | 0.155        |
| <i>EGF</i>                                      | -5.11           | <b>0.013</b> |
| <i>HGF</i>                                      | 4.70            | <b>0.013</b> |
| <i>PDGFA</i>                                    | -1.74           | <b>0.022</b> |
| <i>PDGFB</i>                                    | -1.19           | 0.197        |
| <i>VEGFA</i>                                    | -3.79           | 0.259        |

| Cell adhesion molecules |                 |              |
|-------------------------|-----------------|--------------|
| Gene symbol             | Fold Regulation | p-value      |
| <i>ITGA1</i>            | -3.71           | 0.117        |
| <i>ITGA2</i>            | 2.18            | 0.106        |
| <i>ITGA3</i>            | 3.21            | <b>0.031</b> |
| <i>ITGAV</i>            | -2.30           | <b>0.008</b> |
| <i>ITGB1</i>            | 1.07            | 0.787        |
| <i>ITGB3</i>            | -1.27           | 0.158        |
| <i>ITGB5</i>            | -2.62           | <b>0.016</b> |
| <i>ITGB6</i>            | 2.24            | 0.381        |
| <i>ITGB8</i>            | 1.39            | 0.506        |
| Transcription factors   |                 |              |
| Gene symbol             | Fold Regulation | p-value      |
| <i>CEBPB</i>            | 1.47            | 0.368        |
| <i>JUN</i>              | 2.02            | 0.275        |
| <i>MYC</i>              | 1.61            | 0.159        |
| <i>NFKB1</i>            | 1.01            | 0.890        |
| <i>SPI1</i>             | 1.50            | <b>0.048</b> |
| <i>STAT1</i>            | -1.66           | 0.124        |
| <i>STAT6</i>            | 1.75            | 0.294        |
| Other fibrosis factors  |                 |              |
| Gene symbol             | Fold Regulation | p-value      |
| <i>ACTA2</i>            | -11.09          | <b>0.022</b> |
| <i>AKT1</i>             | 1.47            | 0.244        |
| <i>BCL2</i>             | 10.74           | 0.053        |
| <i>FASLG</i>            | 2.42            | 0.175        |
| <i>SNAI1</i>            | -2.68           | 0.080        |

**Supplementary Figure 1.**

Original images of blots for Figure 7-B and D. Squared frame with redline indicates the cropped area.

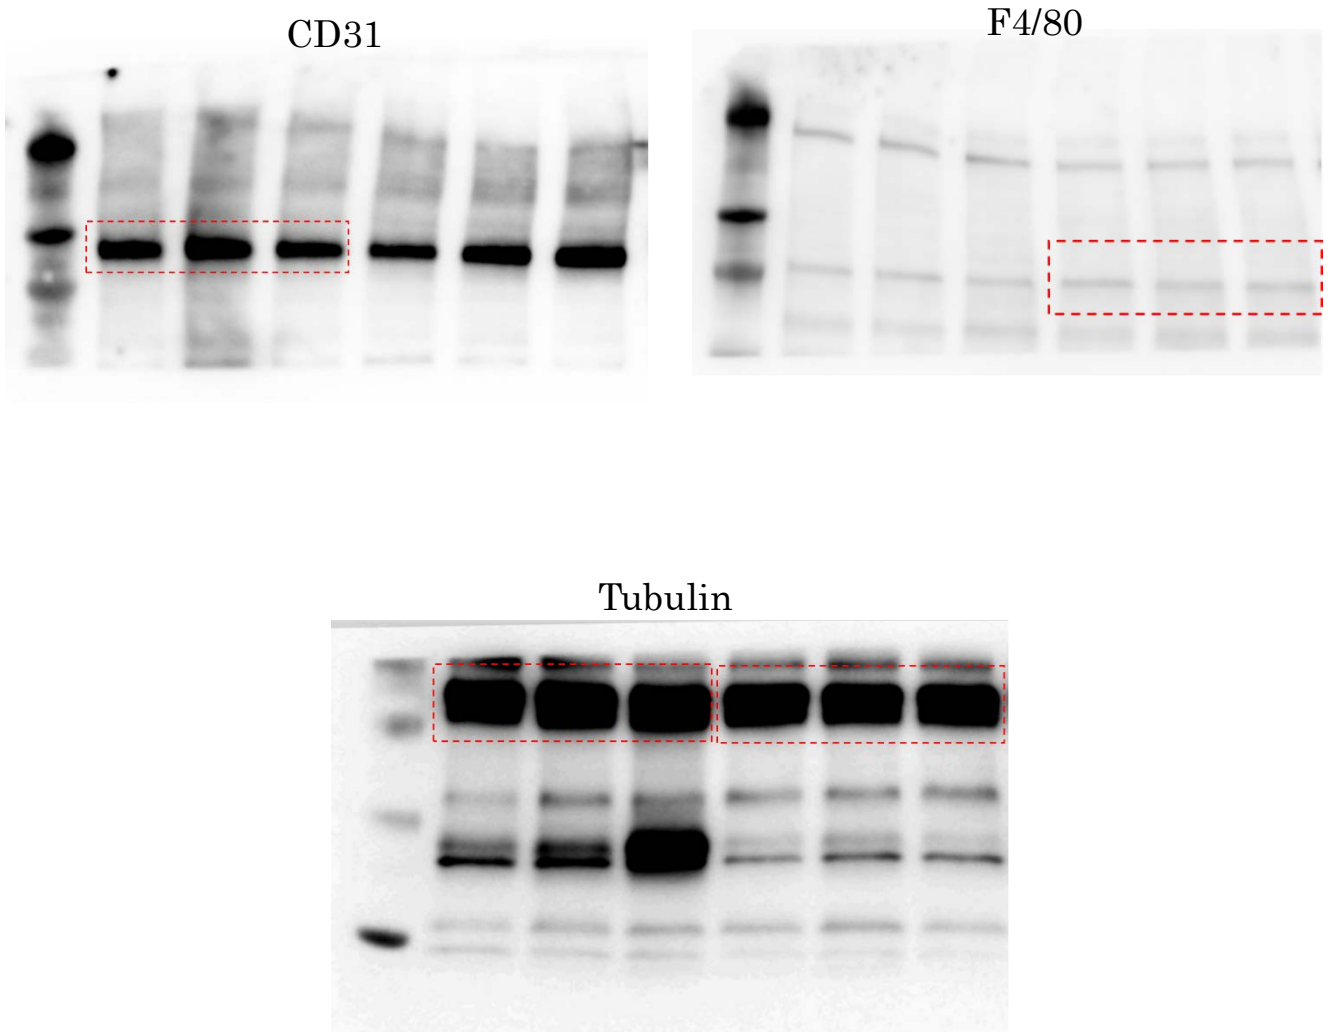

Right square frame indicates internal control of CD31  
Left square frame indicates internal control of F4/80
